# Supplementary material for: Construction of several new s-/p-block complexes containing binuclear metal–terpyridine building blocks: dependence of structural diversity on the number of coordinated water molecules
Source: Royal Society of Chemistry journal article supplement (doi:10.1039/c3ce41790e), 2013-11-11
Supplement: c3ce41790e.pdf [file c3ce41790e.pdf]

## Construction of Several New *s/p*-Block Complexes Containing Binuclear Metal-Terpyridine Building Blocks: Dependence of Structural Diversity on Number of Coordinated Water Molecules

Sheng-Run Zheng,\* Rui-Ling Chen, Jun Fan, Wei-Guang Zhang\*

### Supporting information

Table S1 Selected bond lengths [Å] and angles[°] for the compounds.<sup>a</sup>

| Complex 1           |            |                     |            |
|---------------------|------------|---------------------|------------|
| Mg(1)-O(1W)         | 2.018(2)   | Mg(1)-O(2W)         | 2.058(2)   |
| Mg(1)-O(6)#1        | 2.096(2)   | Mg(1)-N(2)          | 2.133(2)   |
| Mg(1)-N(3)          | 2.189(3)   | Mg(1)-N(1)          | 2.231(3)   |
| O(1W)-Mg(1)-O(2W)   | 88.91(11)  | O(1W)-Mg(1)-O(6)#1  | 86.08(10)  |
| O(2W)-Mg(1)-O(6)#1  | 172.12(11) | O(1W)-Mg(1)-N(2)    | 174.74(11) |
| O(2W)-Mg(1)-N(2)    | 94.58(10)  | O(6)#1-Mg(1)-N(2)   | 90.86(9)   |
| O(1W)-Mg(1)-N(3)    | 101.33(10) | O(2W)-Mg(1)-N(3)    | 93.70(11)  |
| O(6)#1-Mg(1)-N(3)   | 93.24(9)   | N(2)-Mg(1)-N(3)     | 74.55(9)   |
| O(1W)-Mg(1)-N(1)    | 110.55(10) | O(2W)-Mg(1)-N(1)    | 86.69(11)  |
| O(6)#1-Mg(1)-N(1)   | 89.39(9)   | N(2)-Mg(1)-N(1)     | 73.64(9)   |
| N(3)-Mg(1)-N(1)     | 148.11(10) |                     |            |
| Complex 2           |            |                     |            |
| Ca(1)-O(4)          | 2.307(4)   | Ca(1)-N(2)#2        | 2.521(4)   |
| Ca(1)-O(1)#1        | 2.326(4)   | Ca(1)-N(3)#2        | 2.558(5)   |
| Ca(1)-O(1W)         | 2.399(4)   | Ca(1)-N(1)#2        | 2.548(5)   |
| Ca(1)-O(2W)         | 2.441(4)   | O(4)-Ca(1)-N(3)#2   | 97.32(16)  |
| O(4)-Ca(1)-O(1)#1   | 167.89(16) | O(1)#1-Ca(1)-N(3)#2 | 94.45(14)  |
| O(4)-Ca(1)-O(1W)    | 90.43(17)  | O(1W)-Ca(1)-N(3)#2  | 75.85(15)  |
| O(1)#1-Ca(1)-O(1W)  | 95.23(16)  | O(2W)-Ca(1)-N(3)#2  | 149.49(14) |
| O(4)-Ca(1)-O(2W)    | 89.96(14)  | N(2)#2-Ca(1)-N(3)#2 | 64.27(14)  |
| O(1)#1-Ca(1)-O(2W)  | 81.29(12)  | O(4)-Ca(1)-N(1)#2   | 86.59(16)  |
| O(1W)-Ca(1)-O(2W)   | 74.51(15)  | O(1)#1-Ca(1)-N(1)#2 | 84.04(14)  |
| O(4)-Ca(1)-N(2)#2   | 80.17(12)  | O(1W)-Ca(1)-N(1)#2  | 157.16(14) |
| O(1)#1-Ca(1)-N(2)#2 | 102.53(12) | O(2W)-Ca(1)-N(1)#2  | 82.85(14)  |
| O(1W)-Ca(1)-N(2)#2  | 137.16(15) | N(2)#2-Ca(1)-N(1)#2 | 64.48(13)  |
| O(2W)-Ca(1)-N(2)#2  | 146.21(14) | N(3)#2-Ca(1)-N(1)#2 | 126.99(14) |
| Complex 3           |            |                     |            |
| N(2)-Pb(1)          | 2.495(5)   | N(1)-Pb(1)          | 2.530(6)   |
| N(3)-Pb(1)          | 2.533(7)   | Pb(1)-O(1)#1        | 2.622(6)   |
| O(1W)-Pb(1)         | 2.400(7)   |                     |            |
| O(1W)-Pb(1)-N(2)    | 87.3(2)    | N(1)-Pb(1)-N(3)     | 128.0(2)   |
| O(1W)-Pb(1)-N(1)    | 86.7(2)    | O(1W)-Pb(1)-O(1)#1  | 160.5(2)   |
| N(2)-Pb(1)-N(1)     | 65.1(2)    | N(2)-Pb(1)-O(1)#1   | 73.59(19)  |
| O(1W)-Pb(1)-N(3)    | 78.9(3)    | N(1)-Pb(1)-O(1)#1   | 82.2(2)    |

|                      |           |                     |           |
|----------------------|-----------|---------------------|-----------|
| N(2)-Pb(1)-N(3)      | 64.5(2)   | N(3)-Pb(1)-O(1)#1   | 95.4(2)   |
| <b>Complex 4</b>     |           |                     |           |
| Pb(1)-O(2)#1         | 2.457(16) | Pb(1)-N(1)          | 2.589(19) |
| Pb(1)-N(2)           | 2.542(17) | Pb(1)-O(6)#2        | 2.684(15) |
| Pb(1)-N(3)           | 2.58(2)   | O(6)-Pb(1)#2        | 2.684(15) |
| O(2)-Pb(1)#1         | 2.457(16) |                     |           |
| N(2)-Pb(1)-N(1)      | 64.1(5)   | N(3)-Pb(1)-N(1)     | 122.7(6)  |
| O(2)#1-Pb(1)-N(2)    | 102.4(6)  | O(2)#1-Pb(1)-O(6)#2 | 167.0(7)  |
| O(2)#1-Pb(1)-N(3)    | 87.9(7)   | N(2)-Pb(1)-O(6)#2   | 72.4(5)   |
| N(2)-Pb(1)-N(3)      | 62.7(5)   | N(3)-Pb(1)-O(6)#2   | 79.1(5)   |
| O(2)#1-Pb(1)-N(1)    | 83.6(6)   | N(1)-Pb(1)-O(6)#2   | 103.9(5)  |
| <b>Complex 5</b>     |           |                     |           |
| Pb(1)-N(8)#1         | 2.497(7)  | Pb(2)-N(1)          | 2.519(9)  |
| Pb(1)-O(10)#1        | 2.507(7)  | Pb(2)-O(7)          | 2.656(6)  |
| Pb(1)-N(7)#1         | 2.514(8)  | Pb(3)-N(4)          | 2.507(7)  |
| Pb(1)-N(9)#1         | 2.523(8)  | Pb(3)-O(17)         | 2.514(12) |
| Pb(1)-O(6)           | 2.574(7)  | Pb(3)-N(04)         | 2.510(9)  |
| Pb(2)-O(1W)          | 2.478(8)  | Pb(3)-N(6)          | 2.515(9)  |
| Pb(2)-N(2)           | 2.502(8)  | Pb(3)-O(17')        | 2.757(19) |
| Pb(2)-N(3)           | 2.516(8)  | Pb(3)-O(3)          | 2.631(7)  |
| N(8)#1-Pb(1)-O(10)#1 | 75.8(2)   | N(3)-Pb(2)-O(7)     | 87.1(2)   |
| N(8)#1-Pb(1)-N(7)#1  | 64.9(3)   | N(1)-Pb(2)-O(7)     | 79.3(2)   |
| O(10)#1-Pb(1)-N(7)#1 | 79.0(3)   | N(4)-Pb(3)-O(17)    | 75.3(3)   |
| N(8)#1-Pb(1)-N(9)#1  | 65.3(3)   | N(4)-Pb(3)-N(04)    | 64.8(3)   |
| O(10)#1-Pb(1)-N(9)#1 | 90.3(3)   | O(17)-Pb(3)-N(04)   | 101.2(4)  |
| N(7)#1-Pb(1)-N(9)#1  | 130.2(3)  | N(4)-Pb(3)-N(6)     | 64.8(3)   |
| N(8)#1-Pb(1)-O(6)    | 84.9(2)   | O(17)-Pb(3)-N(6)    | 66.9(4)   |
| O(10)#1-Pb(1)-O(6)   | 160.6(2)  | N(04)-Pb(3)-N(6)    | 129.6(3)  |
| N(7)#1-Pb(1)-O(6)    | 94.3(3)   | N(4)-Pb(3)-O(17')   | 72.5(4)   |
| N(9)#1-Pb(1)-O(6)    | 80.1(3)   | O(17)-Pb(3)-O(17')  | 34.4(5)   |
| O(1W)-Pb(2)-N(2)     | 77.6(2)   | N(04)-Pb(3)-O(17')  | 69.0(5)   |
| O(1W)-Pb(2)-N(3)     | 85.1(3)   | N(6)-Pb(3)-O(17')   | 97.0(5)   |
| N(2)-Pb(2)-N(3)      | 64.9(3)   | N(4)-Pb(3)-O(3)     | 69.8(2)   |
| O(1W)-Pb(2)-N(1)     | 82.2(3)   | O(17)-Pb(3)-O(3)    | 143.9(3)  |
| N(2)-Pb(2)-N(1)      | 65.4(3)   | N(04)-Pb(3)-O(3)    | 71.9(2)   |
| N(3)-Pb(2)-N(1)      | 130.2(3)  | N(6)-Pb(3)-O(3)     | 89.8(3)   |
| O(1W)-Pb(2)-O(7)     | 147.8(2)  | O(17')-Pb(3)-O(3)   | 134.1(4)  |
| N(2)-Pb(2)-O(7)      | 70.7(2)   | N(3)-Pb(2)-O(7)     | 87.1(2)   |

<sup>a</sup>Symmetry transformations used to generate equivalent atoms: #1  $-x + 2, -y - 1, -z + 3$  for complex 1; #1  $x - 1/2, -y + 1/2, z - 1/2$ , #2  $-x + 1, y, -z + 3/2$ , #3  $x + 1/2, -y + 1/2, z + 1/2$ , #4  $-x + 1, y, -z + 1/2$  for complex 2; #1  $-x + 2, -y + 3, -z + 3$  for complex 3; #1  $-x - 1/2, -y + 3/2, -z + 2$ , #2  $-x, y, -z + 5/2$  for complex 4; #1  $x - 1, y - 1, z$ , #2  $x + 1, y + 1, z$  for complex 5.

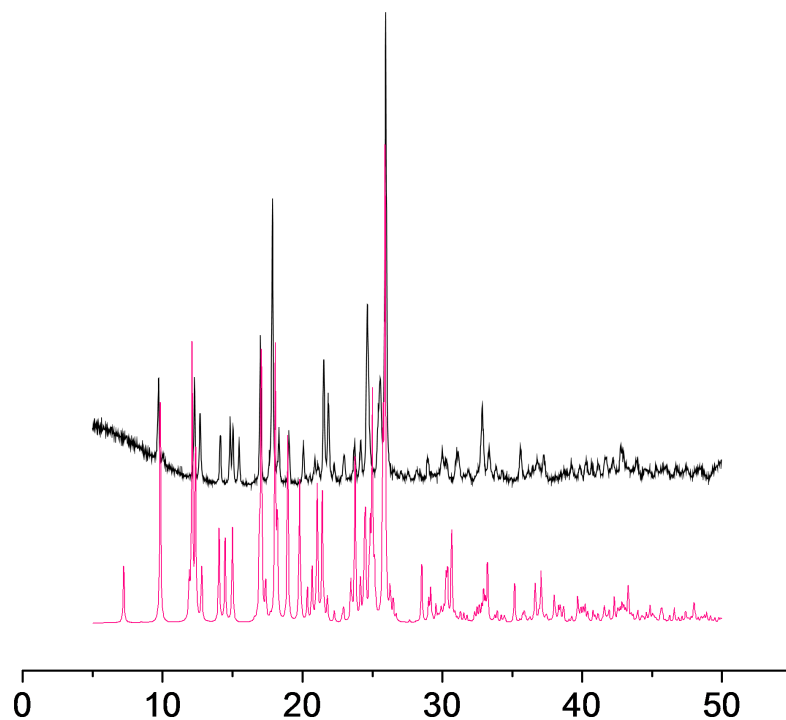

**Fig. S1** The simulated X-ray powder diffraction patterns (lower) and the measured one (upper) of complex **1**

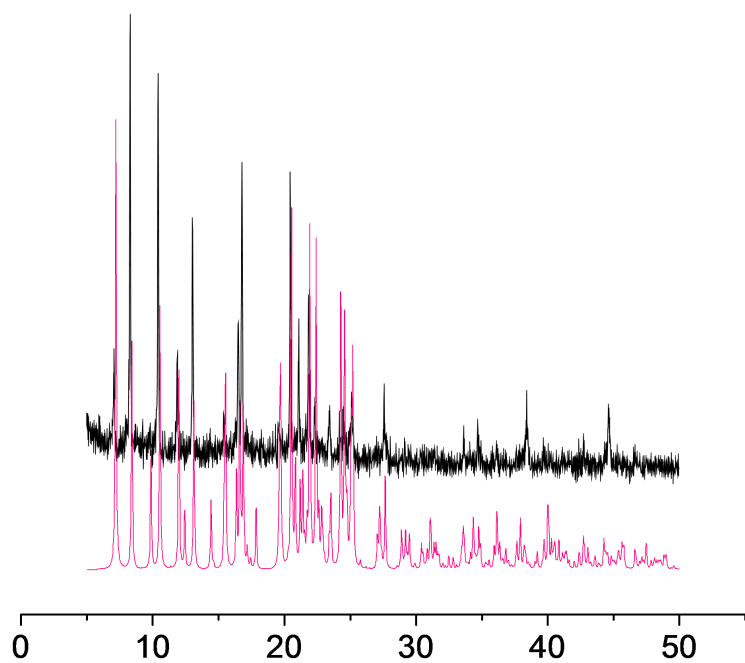

**Fig. S2** The simulated X-ray powder diffraction patterns (lower) and the measured one (upper) of complex **2**

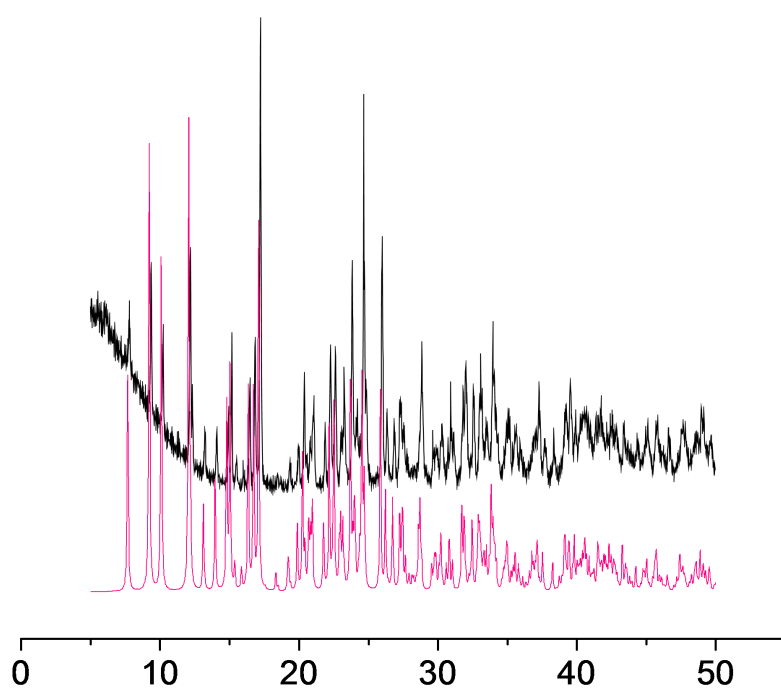

**Fig. S3** The simulated X-ray powder diffraction patterns (lower) and the measured one (upper) of complex **3**

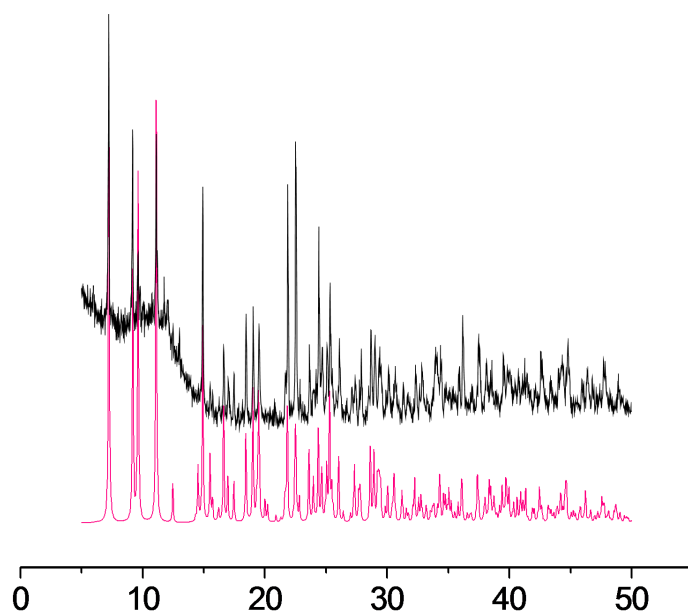

**Fig. S4** The simulated X-ray powder diffraction patterns (lower) and the measured one (upper) of complex **4**

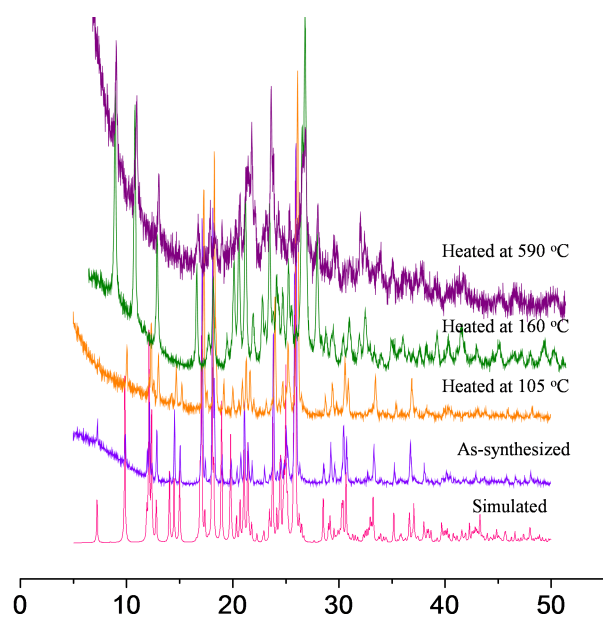

**Fig. S5** The X-ray powder diffraction patterns of simulated, as-synthesized, and after heated at certain temperature of complex **1**.

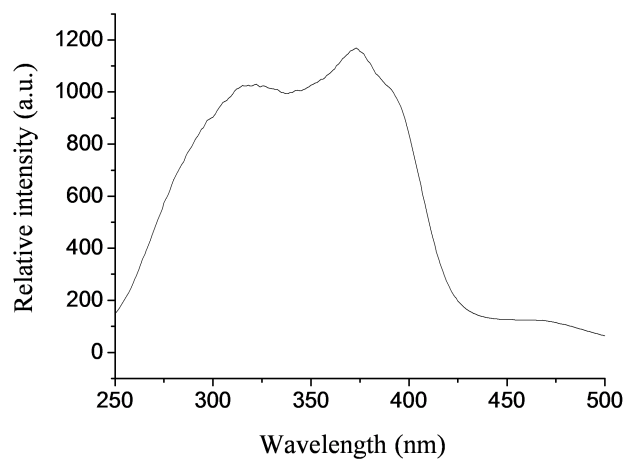

**Fig. S6** Solid-state emission spectrum for H<sub>2</sub>DSPT in the solid state at room temperature (fixing the emission wavelength at 518 nm).

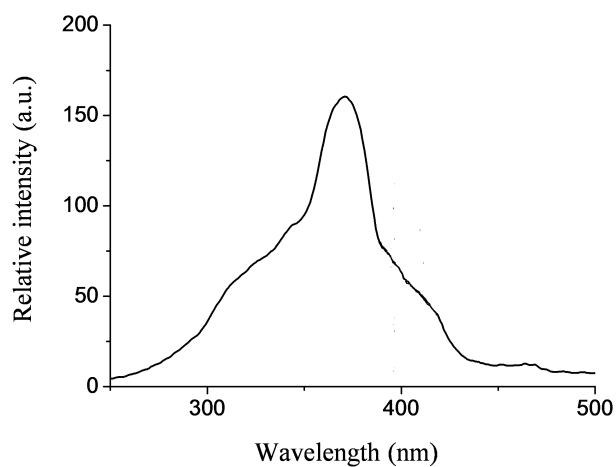

**Fig. S7** Solid-state emission spectrum for complex **1** in the solid state at room temperature (fixing the emission wavelength at 520 nm).

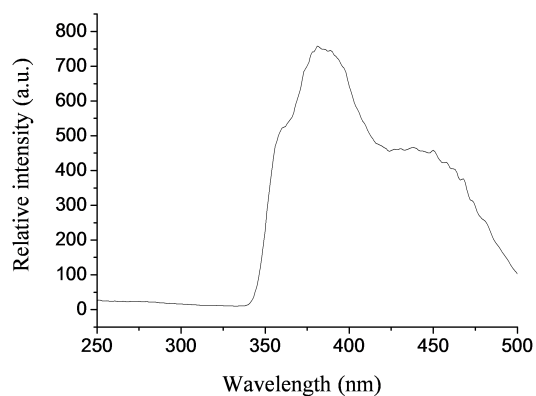

**Fig. S8** Solid-state emission spectrum for complex **2** in the solid state at room temperature (fixing the emission wavelength at 514 nm).

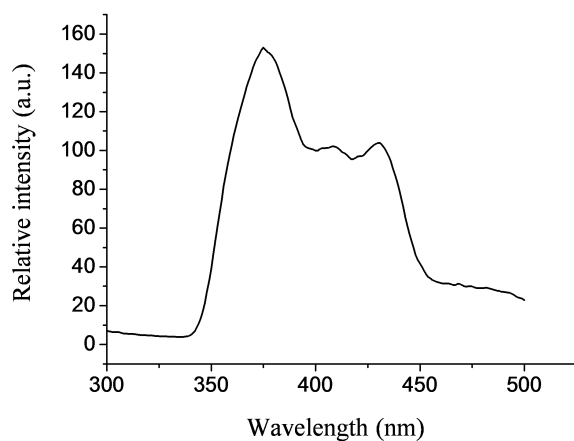

**Fig. S9** Solid-state emission spectrum for complex **3** in the solid state at room temperature (fixing the emission wavelength at 548 nm).

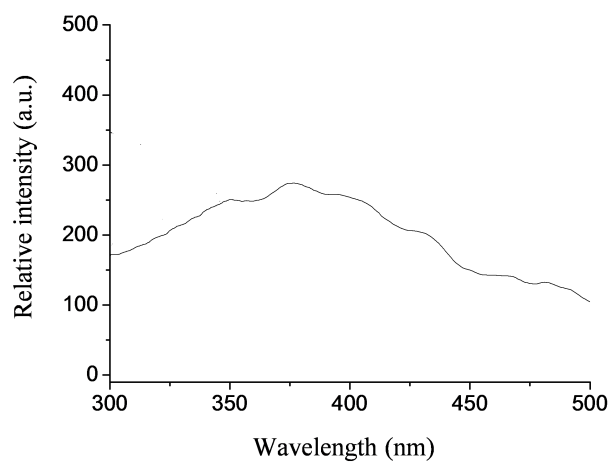

**Fig. S10** Solid-state emission spectrum for complex **4** in the solid state at room temperature (fixing the emission wavelength at 545 nm).

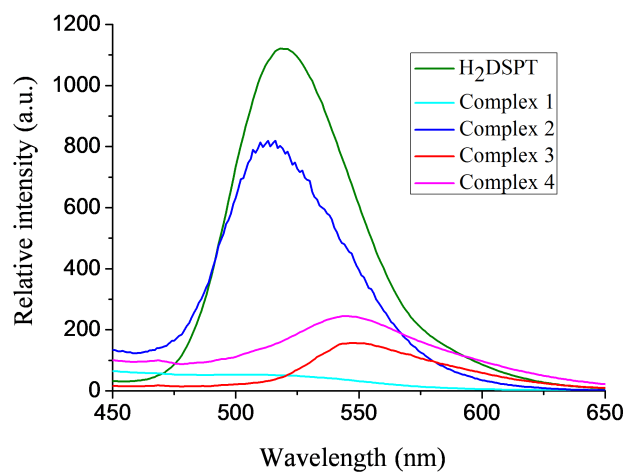

**Fig. S11** Solid-state emission spectrum for H<sub>2</sub>DSPT and **1-4** in the solid state at room temperature (excited at 373 nm).
